# Supplementary material for: High IRF8 expression correlates with CD8 T cell infiltration and is a predictive biomarker of therapy response in ER-negative breast cancer
Source: Springer Nature journal article supplement (doi:10.1186/s13058-021-01418-7), 2021-03-25

# Additional file 1: Figure S1

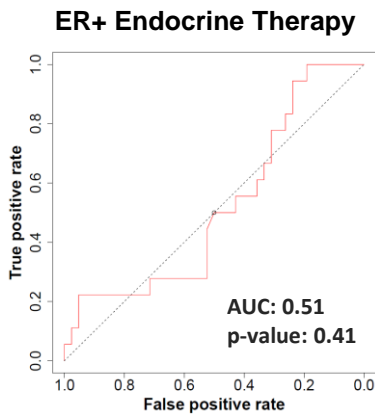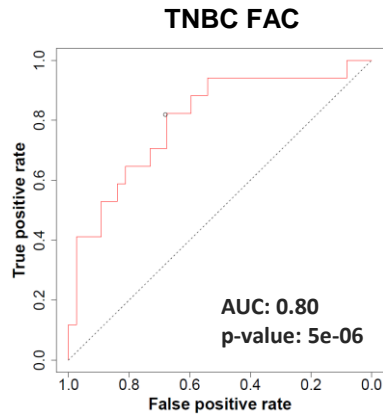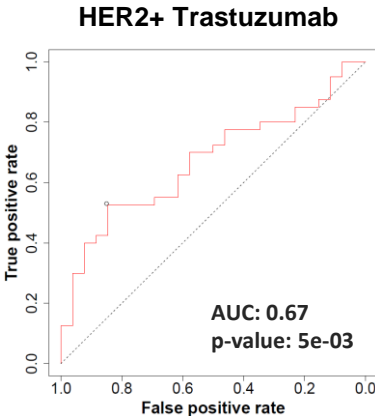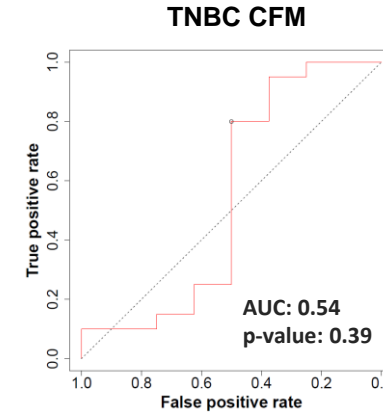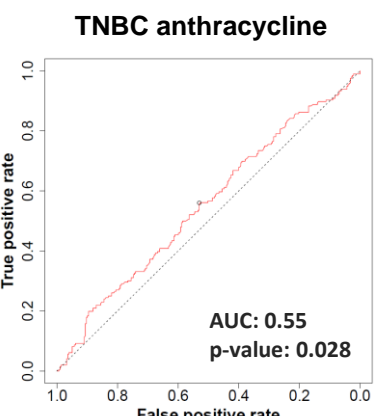

Supplement: MOESM1 [file 19006306]
